# Supplementary material for: Understanding the Relationship between Socio-Economic Status, Physical Activity and Sedentary Behaviour, and Adiposity in Young Adult South African Women Using Structural Equation Modelling
Source: Int J Environ Res Public Health. 2017 Oct 23;14(10):1271. doi: 10.3390/ijerph14101271 (PMC5664772; doi:10.3390/ijerph14101271)
Supplement: Supplementary file 1 [file ijerph-14-01271-s001.pdf]

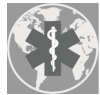

## Supplementary Materials

# Understanding the Relationship between Socio-Economic Status, Physical Activity and Sedentary Behaviour, and Adiposity in Young Adult South African Women Using Structural Equation Modelling

Lisa K. Micklesfield, Richard J. Munthali<sup>1</sup>, Alessandra Prioreshi, Rihlat Said-Mohamed, Alastair van Heerden, Stephen Tollman, Kathleen Kahn, David Dunger and Shane A. Norris

**Table S1.** Structural equation model for household assets and moderate-vigorous intensity physical activity on waist circumference in South African urban and rural young adult women, separately and pooled.

| Effect of:                 | Outcome: | Direct effects (95% CI)        | Indirect effects (95% CI) | Total effects (95% CI)         | Proportion of total effect mediated |
|----------------------------|----------|--------------------------------|---------------------------|--------------------------------|-------------------------------------|
| Household assets (urban)   | WC       | −0.14 (−0.61; 0.34)            |                           | −0.17 (−0.64; 0.31)            | 0.18                                |
|                            | via MVPA |                                | −0.030 (−0.09; 0.028)     |                                |                                     |
| MVPA (urban) <sup>#</sup>  | MVPA     | −41.21 (−72.85; −9.56) **      |                           | −41.21 (−72.85; −9.56) **      |                                     |
|                            | WC       | 0.0007 (−0.001; 0.002)         |                           | 0.0007 (−0.001; 0.002)         |                                     |
| Household assets (rural)   | WC       | 0.62 (0.01; 1.23) *            |                           | 0.604 (−0.01; 1.21) *          | 0.03 <sup>a</sup>                   |
|                            | via MVPA |                                | −0.016 (−0.060; 0.028)    |                                |                                     |
| MVPA (rural) <sup>#</sup>  | MVPA     | −27.35 (−84.96; 30.27)         |                           | −27.35 (−84.96; 30.27)         |                                     |
|                            | WC       | 0.001 (−0.0005; 0.0016)        |                           | 0.001 (−0.001; 0.002)          |                                     |
| Household assets (pooled)  | WC       | −0.1 (−0.43; 0.23)             |                           | −0.25 (−0.57; 0.07)            | 0.6                                 |
|                            | via MVPA |                                | −0.15 (−0.267; −0.037) ** |                                |                                     |
| MVPA (pooled) <sup>#</sup> | MVPA     | −142.73 (−168.27; −117.20) *** |                           | −142.73 (−168.27; −117.20) *** |                                     |
|                            | WC       | 0.001 (0.0003; 0.0018) **      |                           | 0.001 (0.0003; 0.0018) **      |                                     |

Adjusted for age; \*  $p < 0.05$ ; \*\*  $p < 0.01$ ; \*\*\*  $p < 0.001$ ; <sup>a</sup> Assessed using the absolute values for both indirect and direct effects. <sup>#</sup> MVPA multiplied by 100. MVPA; moderate to vigorous physical activity, WC; waist circumference. Urban Fit Indices: LR test of model vs. saturated:  $\chi^2(2) = 0.896$ , Prob >  $\chi^2 = 0.639$ ; RMSEA = 0.00; CFI = 1.00. Comparative fit index; TLI= 1.37 Tucker-Lewis index; SRMR = 0.011: Standardized root mean squared residual, CD= 0.020 Coefficient of determination. Rural Fit Indices: LR test of model vs. saturated:  $\chi^2(2) = 1.46$ , Prob >  $\chi^2 = 0.48$ ; RMSEA = 0.00; TLI= 1.12 Tucker-Lewis index; SRMR = 0.017: Standardized root mean squared residual,

CD = 0.035 Coefficient of determination. Pooled Fit Indices: LR test of model vs. saturated:  $\chi^2(2) = 18.25$ , Prob >  $\chi^2 = 0.000$ ; RMSEA = 0.096; CFI = 0.88 Comparative fit index; TLI = 0.70 Tucker-Lewis index; SRMR = 0.034: Standardized root mean squared residual, CD = 0.126 Coefficient of determination.

**Table S2.** Structural equation model for household assets and sitting time on waist circumference in South African urban and rural young adult women, separately and pooled.

| Effect of:                | Outcome:         | Direct effects (95% CI)   | Indirect effects (95% CI) | Total effects (95% CI)    | Proportion of total effect mediated |
|---------------------------|------------------|---------------------------|---------------------------|---------------------------|-------------------------------------|
| Household assets (urban)  | WC               | −0.17 (−0.64; 0.31)       | −0.002 (0.033; 0.029)     | −0.172 (−0.640; 0.304)    | 0.01                                |
|                           | via sitting time |                           |                           |                           |                                     |
|                           | Sitting time     | 37.53 (−13.54; 88.59)     |                           | 37.53 (−13.54; 88.59)     |                                     |
| Sitting time (urban)      | WC               | −0.000 (−0.0009; 0.0008)  |                           | −0.000 (−0.0009; 0.0008)  |                                     |
| Household assets (rural)  | WC               | 0.602 (−0.008; 1.21) *    | 0.003 (−0.027; 0.034)     | 0.605 (−0.004; 1.215) *   | 0.005                               |
|                           | via sitting time |                           |                           |                           |                                     |
|                           | Sitting time     | 28.65 (−30.59; 88.00)     |                           | 28.65 (−30.59; 88.00)     |                                     |
| Sitting time (rural)      | WC               | 0.0001 (−0.001; 0.001)    |                           | 0.0001 (−0.001; 0.001)    |                                     |
| Household assets (pooled) | WC               | −0.217 (−0.542; 0.107)    | −0.0147 (−0.077; 0.048)   | −0.232 (−0.553; 0.088)    | 0.06                                |
|                           | via sitting time |                           |                           |                           |                                     |
|                           | Sitting time     | 98.20 (66.60; 129.81) *** |                           | 98.20 (66.60; 129.81) *** |                                     |
| Sitting time (pooled)     | WC               | −0.0001 (−0.0008; 0.0005) |                           | −0.0001 (−0.0008; 0.0005) |                                     |

Adjusted for age; \*  $p < 0.05$ ; \*\*  $p < 0.01$ ; \*\*\*  $p < 0.001$ ; <sup>a</sup> Assessed using the absolute values for both indirect and direct effects. WC; waist circumference. Urban Fit Indices: LR test of model vs. saturated:  $\chi^2(2) = 1.97$ , Prob >  $\chi^2 = 0.37$ ; RMSEA = 0.00; CFI = 1.00 Comparative fit index; TLI = 1.027 Tucker-Lewis index; SRMR = 0.017: Standardized root mean squared residual, CD = 0.012 Coefficient of determination. Rural Fit Indices: LR test of model vs. saturated:  $\chi^2(2) = 0.00$ , Prob >  $\chi^2 = 1.00$ ; RMSEA = 0.00; TLI = 1.55 Tucker-Lewis index; SRMR = 0.000: Standardized root mean squared residual, CD = 0.036 Coefficient of determination. Total Fit Indices: LR test of model vs. saturated:  $\chi^2(2) = 10.31$  Prob >  $\chi^2 = 0.006$ ; RMSEA = 0.069; CFI = 0.82 Comparative fit index; TLI = 0.554 Tucker-Lewis index; SRMR = 0.027: Standardized root mean squared residual, CD = 0.046 Coefficient of determination.
